# Supplementary material
Source: publisher figshare collection journal article supplement (https://tandf.figshare.com/articles/dataset/_/3159703)
Supplement: Supplementary file 3 [file 2]

Archive with 2 entries (2 files):
- kccy_a_1166319_sm0972.pdf
- kccy_a_1166319_sm0489.pdf
