# Supplementary material
Source: publisher figshare collection journal article supplement (https://tandf.figshare.com/articles/dataset/_/3159703)

NPM1 vs mTOR  
(Spearman R = 0.4137,  $p=0.0135$ )

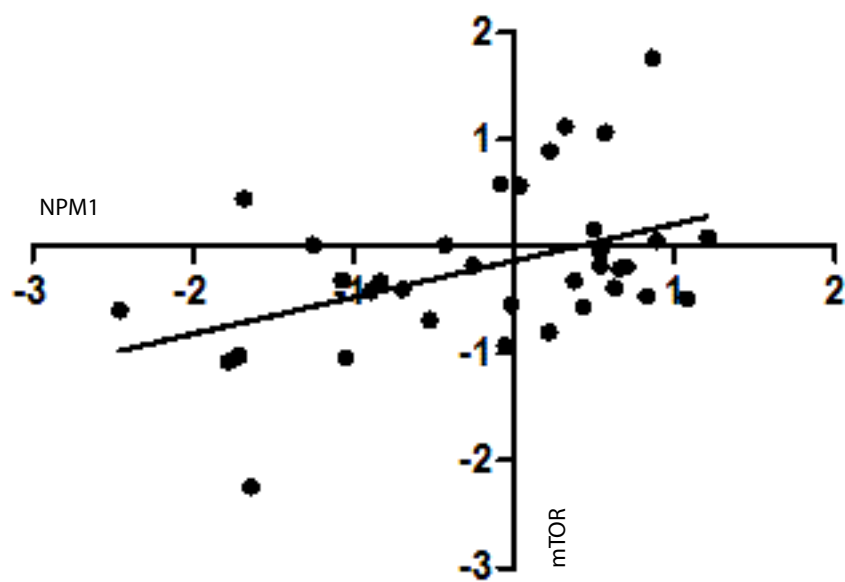

Supplement: Supplementary file 1 [file 2]

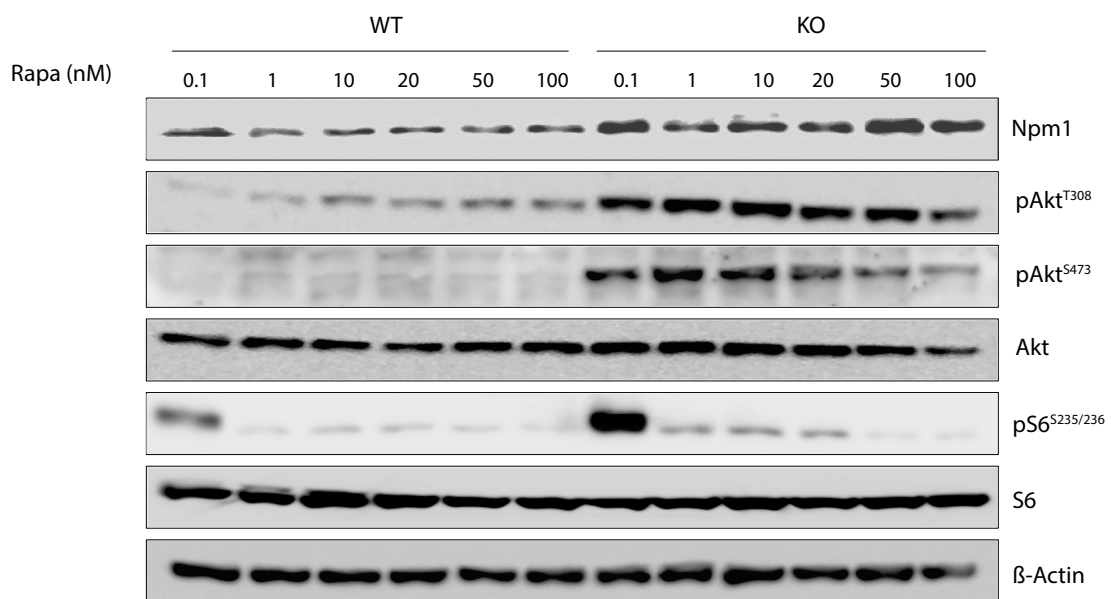

Supplement: Supplementary file 2 [file 2]
